# Supplementary material for: Elucidating factors important for monovalent cation selectivity in enzymes: E. coli β-galactosidase as a model
Source: Royal Society of Chemistry journal article supplement (doi:10.1039/c4cp04952g), 2015-01-01
Supplement: c4cp04952g1.pdf [file c4cp04952g1.pdf]

SUPPLEMENTARY INFORMATION WHEATLEY ET AL

**Supplementary Table 1.** Effect of  $M^+$  binding on the charge of the  $M^+$  ligating atoms. The model systems were based on the  $Na^+$  replete  $\beta$ -galactosidase structure 1DP0 and the  $K^+$  replete structure 4TTG. The systems included the side chains of Tyr 100, Asp 201, and Asn 604. To obtain a covalently closed system, the  $C\alpha$  of each of these residues was converted to methyl groups. The system also included the Phe 601 – Cys 602 peptide and the Phe 601 side chain. The N of Phe 601 and the  $C\alpha$  of Cys 602 were converted to methyl groups. Finally, the system contained the  $M^+$  coordinating waters, and, optionally, the  $M^+$ . Partial atomic charges were calculated based on Mulliken and Natural Bond Orbital (NBO) analysis for systems with or without the  $M^+$ . Calculations were performed with Gaussian09 at the B3LYP/QZVP level of theory.

**Mulliken Charges**

|             | - Na   | + Na   | $\Delta$ | %      |
|-------------|--------|--------|----------|--------|
| Na          | -      | 0.931  | -        |        |
| Asp 201 OD2 | -0.399 | -0.534 | -0.135   | 33.7%  |
| Asn 604 OD1 | -0.242 | -0.527 | -0.285   | 117.7% |
| Phe 601 O   | -0.310 | -0.429 | -0.119   | 38.4%  |
| H2O 1 O     | -0.719 | -0.882 | -0.163   | 22.7%  |
| H2O 2 O     | -0.663 | -0.748 | -0.084   | 12.7%  |

|             | - K    | + K    | $\Delta$ | %     |
|-------------|--------|--------|----------|-------|
| K           | -      | 0.627  | -        |       |
| Asp 201 OD2 | -0.546 | -0.599 | -0.053   | 9.7%  |
| Asn 604 OD1 | -0.402 | -0.488 | -0.086   | 21.4% |
| Phe 601 O   | -0.444 | -0.592 | -0.148   | 33.3% |
| H2O 1 O     | -0.306 | -0.37  | -0.064   | 20.9% |
| H2O 2 O     | -0.308 | -0.359 | -0.051   | 16.6% |
| H2O 2 O     | -0.326 | -0.363 | -0.037   | 11.3% |

**NBO Charges**

|             | - Na   | + Na   | $\Delta$ | %     |
|-------------|--------|--------|----------|-------|
| Na          | -      | 0.717  | -        |       |
| Asp 201 OD2 | -0.706 | -0.761 | -0.055   | 7.8%  |
| Asn 604 OD1 | -0.536 | -0.615 | -0.079   | 14.7% |
| Phe 601 O   | -0.589 | -0.675 | -0.086   | 14.5% |
| H2O 1 O     | -0.843 | -0.896 | -0.053   | 6.2%  |
| H2O 2 O     | -0.884 | -0.894 | -0.010   | 1.1%  |

|             | - K    | + K    | $\Delta$ | %    |
|-------------|--------|--------|----------|------|
| K           | -      | 0.599  | -        |      |
| Asp 201 OD2 | -0.736 | -0.767 | -0.031   | 4.2% |
| Asn 604 OD1 | -0.576 | -0.631 | -0.055   | 9.5% |
| Phe 601 O   | -0.626 | -0.685 | -0.059   | 9.4% |
| H2O 1 O     | -0.878 | -0.899 | -0.021   | 2.4% |
| H2O 2 O     | -0.865 | -0.878 | -0.013   | 1.5% |
| H2O 2 O     | -0.872 | -0.893 | -0.021   | 2.4% |

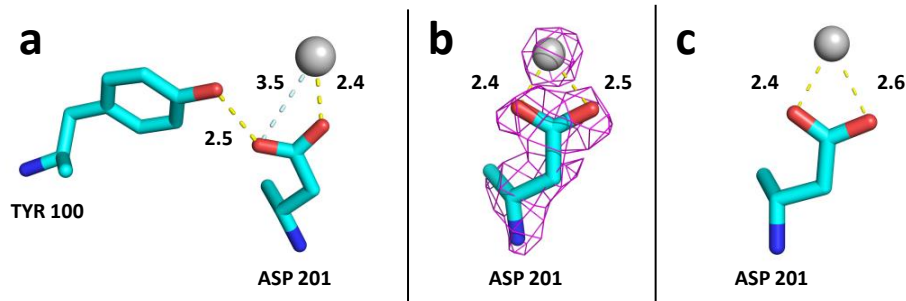

**Supplementary Figure 1.** Computational studies of Y100A substituted  $\beta$ -galactosidase showing the role Tyr 100 has orienting the Asp 201– $M^+$  interaction. Coordination distances are in Å.

- A. The native protein coordination structure. Coordinates are from the  $Na^+$  replete crystal structure 1DP0. Coordination distances are averaged over all 4 monomers of the tetramer.
- B. Y100A substituted  $\beta$ -galactosidase modeled by molecular dynamics. A hydrated system based on the  $Na^+$  replete  $\beta$ -galactosidase structure 1DP0 was constructed with Ala substituted for Tyr 100. The system consisted of a protein monomer, contained 94014 atoms and was approximately  $84 \times 84 \times 129$  Å in size. The simulations were performed with additive force-fields (CHARMM-27) and with parameters indicated in the main paper. The system was equilibrated for 0.25 ns and the production run was 0.5 ns. Asp 201 to  $Na^+$  coordination distances are averaged over the production run. The mesh outlines the average positions of the  $Na^+$  and Asp 201 side chain in the production run, contoured at 1 standard deviation.
- C. Y100A substituted  $\beta$ -galactosidase modeled by QM/MM. A system based on the  $Na^+$  replete  $\beta$ -galactosidase structure 1DP0 was constructed with Ala substituted for Tyr 100. For QM/MM minimizations, SCCDFT-TB methods were employed. Atom represented with this method were the  $M^+$ , the side chains of Tyr 100, Asp 201, Asn 604, and Try 568, the main chain atoms (side chains excluded) from Gln 600 C to Cys 602 C, and the waters within 4 Å of the  $M^+$ . Molecular mechanics atoms were represented with CHARMM-27 force fields. Protein atoms further than 10 Å from the QM region were fixed in place and water molecules further than 4 Å from the  $M^+$  were deleted from the system. Further details were as described for the QM-MM models in the main article. Similar calculations with the wild-type  $\beta$ -galactosidase maintained the experimental structure.
